# Supplementary material for: A Higher Dose of Staphylococcus aureus Enterotoxin B Led to More Th1 and Lower Th2/Th1 Ratio in Th Cells
Source: MDPI journal article supplement (doi:10.3390/toxins15060363), 2023-05-28
Supplement: s1 [file s1]

## Supplementary Materials:

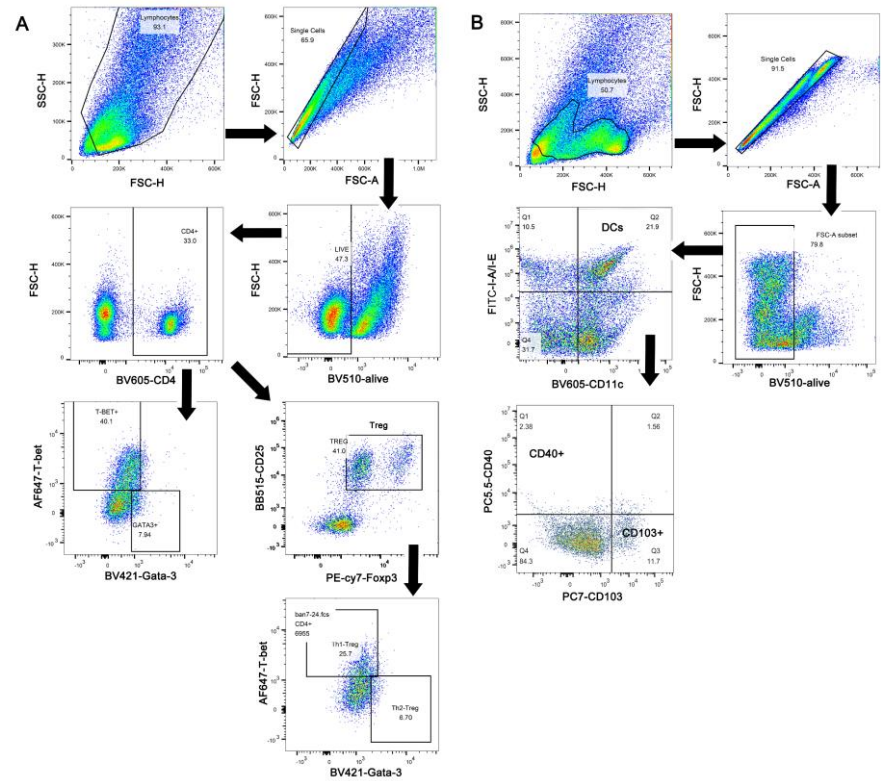

**Figure S1.** (A) The gating strategy of Th cells. (B) The gating strategy of DCs.

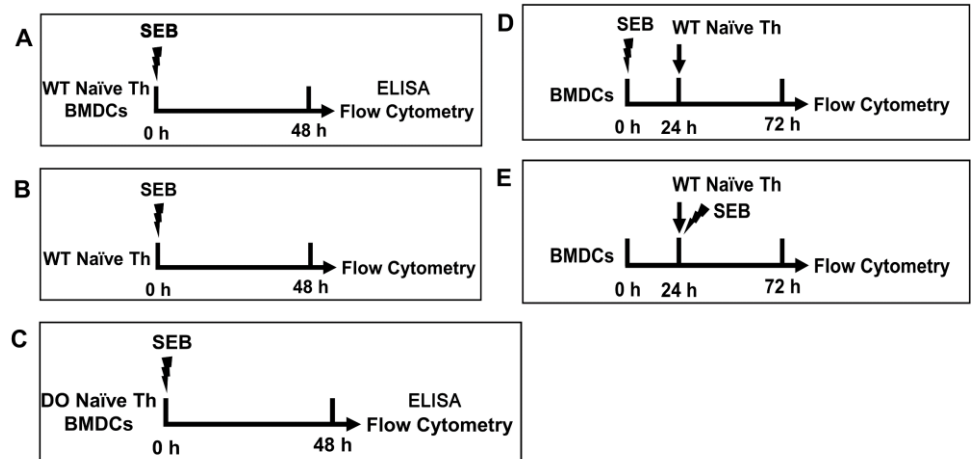

**Figure S2.** The model diagrams of cell stimulation. (A) WT naïve Th cells were co-cultured with BMDCs under stimulation of different doses of SEB. (B) WT naïve Th cells were stimulated with different doses of SEB. (C) WT naïve Th cells were co-cultured with BMDCs under stimulation of different doses of SEB. (D) BMDCs were pre-stimulated with different doses of SEB and then co-cultured with WT naïve Th cells. (E) BMDCs were pre-cultured in the plate and then co-cultured with WT naïve Th cells under stimulation of different doses of SEB.
